# Supplementary material
Source: HighWire-hosted journal article supplement (https://erj.ersjournals.com/content/55/5/1900748)

## **Online Data Supplement**

**Title:** Structural determinants of long term functional outcomes in young children with cystic fibrosis

**Authors:** Lidija Turkovic, Daan Caudri, Tim Rosenow, Oded Breuer, Conor Murray, Harm AWM Tiddens, Fiona Ramanauskas, Sarath C Ranganathan, Graham L Hall, Stephen M Stick

### **AREST CF Study population**

All children diagnosed with CF in Western Australia are managed at the Princess Margaret Hospital for Children (PMH), Perth and children diagnosed in Victoria who are managed at the Royal Children's Hospital (RCH), Melbourne. Over 95% of eligible children enrolled into the Australian Respiratory Early Surveillance Team for Cystic Fibrosis (AREST CF) program. In Australia, the diagnosis of CF is made in the majority of infants by six weeks of age, following detection by newborn screening [1]. The majority of infants have no respiratory symptoms at diagnosis but may have pulmonary inflammation and infection [2]. The AREST CF early surveillance program includes a comprehensive assessment soon after diagnosis (approximately at three months of age) and then annually until six years of age. Since 2005 a chest CT under general anesthesia was also included in the bi-annual follow-up in children up to the age of 5 years in Melbourne and in the annual follow-up to the age of 6 years in Perth [2]. The study was approved by the ethics committee of the 2 participating institutions and parents of all patients gave informed consent.

## **Computed tomography**

Chest CTs were performed under general anesthesia. Children were intubated with a cuffed tracheal tube and a standardised recruitment manoeuvre was used to reduce procedure related atelectasis. A volume controlled, volumetric (since 2007) or limited slice (prior to 2007) chest CT scan was obtained at end inspiration (Prs = 25cm H<sub>2</sub>O) and end expiration (Prs = 0cm H<sub>2</sub>O) as described previously [3]. CT images were scored for the presence of structural lung disease using a simplified Brody CF-CT scoring method [2, 3]. Each scan was examined in six lobes for volumetric scans (with the lingual treated as a separate lobe), and six zones for limited slice scans (upper, middle and lower areas of the left and right lungs). For each abnormality separately, a score was given per lobe/zone of zero (none present), one (present in less than half of the lobe/zone), or two (present in at least half of the lobe/zone). Lobe/zone scores were summed, and thus for each abnormality there was a maximum score of 12. The following structural abnormalities were scored on inspiration scans: bronchiectasis (bronchus-artery diameter ratio > 1, or lack of tapering for in-plane bronchi), mucous plugging (high-density occlusion of an airway or tree-in-bud sign), and bronchial wall thickening (assessed subjectively by considering the width and brightness of airway walls). The total CT score was determined by summing these three sub-scores, and thus has a maximum score of 36. Trapped air (geographic hypodense regions) was assessed on expiration scans. Details of the scanners and settings used have been previously published [4].

## **Spirometry**

Spirometry measurements performed during admissions or outpatient visits for AREST CF cohort were obtained retrospectively, from PMH and RCH patient

records for all children until the age of 6, for subgroup of children with consent to use patient files up to later ages. Secondly, data linkage with ACDFR was used to obtain additional measurements for all children aged 6 years and older with data available in the ACDFR. Spirometry was performed according to current ATS/ERS guidelines [5, 6]. For the years where more than one measurement was available per child, the annual best was the only one included in analysis.

## References

1. Massie, R.J., et al., *Lessons learned from 20 years of newborn screening for cystic fibrosis*. Med J Aust, 2012. **196**(1): p. 67-70.
2. Sly, P.D., et al., *Lung disease at diagnosis in infants with cystic fibrosis detected by newborn screening*. Am J Respir Crit Care Med, 2009. **180**(2): p. 146-52.
3. Stick, S.M., et al., *Bronchiectasis in infants and preschool children diagnosed with cystic fibrosis after newborn screening*. J Pediatr, 2009. **155**(5): p. 623-8 e1.
4. Mott, L.S., et al., *Progression of early structural lung disease in young children with cystic fibrosis assessed using CT*. Thorax, 2012. **67**(6): p. 509-16.
5. Miller, M.R., et al., *Standardisation of spirometry*. Eur Respir J, 2005. **26**(2): p. 319-38.
6. Pellegrino, R., et al., *Interpretative strategies for lung function tests*. Eur Respir J, 2005. **26**(5): p. 948-68.
7. Quanjer, P.H., et al., *Multi-ethnic reference values for spirometry for the 3-95-yr age range: the global lung function 2012 equations*. Eur Respir J, 2012. **40**(6): p. 1324-43.
8. Group, W.H.O.M.G.R.S., *WHO Child Growth Standards based on length/height, weight and age*. Acta Paediatr Suppl, 2006. **450**: p. 76-85.
9. StataCorp, *Stata Statistical Software: Release 14*. . College Station, TX: StataCorp LP, 2015.

**eTable 1. Absolute Broody Cf-CT scores at ages 5 to 6 years**

|                        | <i>Bronchiectasis</i> | <i>Bronchial wall thickening</i> | <i>Trapped air</i> | <i>Mucus plugging</i> | <i>Total CT score</i> |
|------------------------|-----------------------|----------------------------------|--------------------|-----------------------|-----------------------|
| <i>Absolute scores</i> | <i>3 (1-7)</i>        | <i>9 (6-11)</i>                  | <i>1 (3-6)</i>     | <i>0 (0-1)</i>        | <i>9 (16-25)</i>      |
| <i>Median (IQR)</i>    |                       |                                  |                    |                       |                       |

**eTable 2. Sensitivity analysis for structural predictors of FEV<sub>1</sub> Z score decline****a) Children than only had 1 follow-up spirometry measurement were excluded from analysis**

| CF-CT extent score at age 5-6 years | Mean change (95% CI) p-value (unadjusted)<br>n=686 | Mean change (95% CI) p-value (adjusted*)<br>n=650 |
|-------------------------------------|----------------------------------------------------|---------------------------------------------------|
| Mucus plugging                      | <b>-0.21 (-0.31, -0.11) p&lt;0.001</b>             | <b>-0.18 (-0.27, -0.09) p&lt;0.001</b>            |
| Trapped air                         | <b>-0.11 (-0.16, -0.05) p&lt;0.001</b>             | <b>-0.09 (-0.14, -0.04) p=0.001</b>               |
| Bronchiectasis                      | <b>-0.05 (-0.09, -0.01) p=0.027</b>                | -0.03 (-0.07, 0.01) p=0.203                       |
| Bronchial wall thickening           | -0.02 (-0.07, 0.03) p=0.529                        | -0.01 (-0.06, 0.03) p=0.626                       |
| Total score                         | <b>-0.03 (-0.05, -0.01) p=0.002</b>                | <b>-0.02 (-0.04, -0.00) p=0.014</b>               |

**b) Children than only had 2 follow-up spirometry measurements were excluded from analysis**

| CF-CT extent score at age 5-6 years | Mean change (95% CI) p-value (unadjusted)<br>n=614 | Mean change (95% CI) p-value (adjusted*)<br>n=584 |
|-------------------------------------|----------------------------------------------------|---------------------------------------------------|
| Mucus plugging                      | <b>-0.23 (-0.33, -0.13) p&lt;0.001</b>             | <b>-0.22 (-0.31, -0.12) p&lt;0.001</b>            |
| Trapped air                         | <b>-0.12 (-0.18, -0.06) p&lt;0.001</b>             | <b>-0.11 (-0.17, -0.06) p&lt;0.001</b>            |
| Bronchiectasis                      | <b>-0.05 (-0.09, -0.00) p=0.046</b>                | -0.04 (-0.08, 0.01) p=0.117                       |
| Bronchial wall thickening           | -0.03 (-0.08, 0.03) p=0.330                        | -0.02 (-0.07, 0.04) p=0.537                       |
| Total score                         | <b>-0.03 (-0.05, -0.01) p=0.001</b>                | <b>-0.03 (-0.05, -0.01) p=0.004</b>               |

\* Models were adjusted for: intrinsic disease severity (Homozygous D508 mutation, pancreatic sufficiency and gender), test centre and age at spirometry.

**eTable 3. Structural predictors of FVC Z score decline based on a CT scan available at ages 5-6 years and annual spirometry measurements in the following 10 years.**

| ZFVC                      | Unadjusted $\beta$ (95% CI)<br>n=697   | Adjusted $\beta$ (95% CI)<br>n=683     |
|---------------------------|----------------------------------------|----------------------------------------|
| Mucus plugging            | <b>-0.17 (-0.26, -0.09) p&lt;0.001</b> | <b>-0.15 (-0.23, -0.07) p&lt;0.001</b> |
| Trapped air               | <b>-0.08 (-0.13, -0.03) p=0.001</b>    | <b>-0.06 (-0.11, -0.02) p=0.007</b>    |
| Bronchiectasis            | <b>-0.04 (-0.07, 0.00) p=0.050</b>     | -0.03 (-0.06, 0.01) p=0.167            |
| Bronchial wall thickening | -0.01 (-0.05, 0.04) p=0.755            | -0.00 (-0.04, 0.04) p=0.918            |
| Total CT score            | <b>-0.02 (-0.04, -0.01) p=0.008</b>    | <b>-0.02 (-0.03, -0.00) p=0.044</b>    |

**eTable 4.** Structural predictors of FEV<sub>FVC</sub> Z score decline based on a CT scan available at ages 5-6 years and annual spirometry measurements in the following 10 years.

| ZFEV <sub>FVC</sub>       | Unadjusted $\beta$ (95% CI)<br>n=697 | Adjusted $\beta$ (95% CI)<br>n=688 |
|---------------------------|--------------------------------------|------------------------------------|
| Mucus plugging            | <b>-0.07 (-0.14, -0.01) p=0.035</b>  | -0.06 (-0.13, 0.00) p=0.061        |
| Trapped air               | -0.04 (-0.07, 0.00) p=0.055          | -0.03 (-0.07, 0.00) p=0.125        |
| Bronchiectasis            | -0.02 (-0.05, 0.01) p=0.205          | -0.01 (-0.04, 0.02) p=0.559        |
| Bronchial wall thickening | -0.03 (-0.06, 0.01) p=0.127          | -0.03 (-0.06, 0.01) p=0.129        |
| Total CT score            | <b>-0.01 (-0.02, -0.00) p=0.029</b>  | -0.01 (-0.02, 0.00) p=0.083        |

**eTable 5.** Structural predictors of ZFEF<sub>2575</sub> Z score decline based on a CT scan available at ages 5-6 years and annual spirometry measurements in the following 10 years.

| ZFEF <sub>2575</sub>      | Unadjusted $\beta$ (95% CI)<br>n=696 | Adjusted $\beta$ (95% CI)<br>n=685  |
|---------------------------|--------------------------------------|-------------------------------------|
| Mucus plugging            | <b>-0.13 (-0.23, -0.04) p=0.004</b>  | <b>-0.11 (-0.20, -0.03) p=0.011</b> |
| Trapped air               | <b>-0.07 (-0.12, -0.01) p=0.011</b>  | <b>-0.05 (-0.10, -0.00) p=0.043</b> |
| Bronchiectasis            | -0.02 (-0.06, 0.02) p=0.227          | -0.01 (-0.05, 0.03) p=0.750         |
| Bronchial wall thickening | -0.01 (-0.06, 0.03) p= 0.544         | -0.01 (-0.06, 0.03) p=0.621         |
| Total CT score            | <b>-0.02 (-0.03, -0.00) p=0.043</b>  | -0.01 (-0.03, 0.01) p=0.189         |

**eTable 6.** Structural predictors of WHO BMI for age Z score decline based on a CT scan available at ages 5-6 years and annual spirometry measurements in the following 10 years.

| BMI for age Z score       | Unadjusted $\beta$ (95% CI)<br>n=695 | Adjusted $\beta$ (95% CI)<br>n=686  |
|---------------------------|--------------------------------------|-------------------------------------|
| Mucus plugging            | <b>-0.11 (-0.19, -0.03) p=0.007</b>  | <b>-0.10 (-0.18, -0.02) p=0.017</b> |
| Trapped air               | <b>-0.05 (-0.10, -0.01) p=0.024</b>  | -0.04 (-0.08, 0.01) p=0.118         |
| Bronchiectasis            | <b>-0.05 (-0.08, -0.01) p=0.007</b>  | <b>-0.04 (-0.08, -0.02) p=0.022</b> |
| Bronchial wall thickening | -0.04 (-0.08, 0.02) p= 0.061         | -0.03 (-0.08, 0.01) p=0.094         |
| Total CT score            | <b>-0.02 (-0.04, -0.01) p=0.004</b>  | <b>-0.02 (-0.03, -0.00) p=0.017</b> |

**eTable 7.** Adjusted rate of FEV<sub>1</sub> Z score decline per year in presence/absence of different structural abnormality groups.

| CF-CT presence at age 5-6 years | Abnormality absent<br>Rate of decline per year (95% CI)<br>p-value | Abnormality present<br>Rate of decline per year (95% CI)<br>p-value |
|---------------------------------|--------------------------------------------------------------------|---------------------------------------------------------------------|
| Mucus plugging                  | -0.00 (-0.07, 0.06) p=0.903                                        | <b>-0.08 (-0.14, -0.01) p=0.017</b>                                 |
| Trapped air                     | -0.03 (-0.11, 0.05) p=0.486                                        | <b>-0.07 (-0.11, -0.02) p=0.004</b>                                 |
| Bronchiectasis                  | <b>-0.08 (-0.14, -0.02) p=0.011</b>                                | <b>-0.05 (-0.10, -0.00) p=0.037</b>                                 |
| Bronchial wall thickening       | <b>-0.14 (-0.26, -0.03) p=0.014</b>                                | <b>-0.06 (-0.10, -0.02) p=0.001</b>                                 |

**eTable 8.** Sensitivity analysis for modelling CF-CT score as continuous variable: hazard ratios of time until FEV<sub>1</sub> Z score falls below -1.64 for every 1 point increase in a total CF-CT score

| Age (years) | Hazard ratio (unadjusted)<br>(95% CI) p-value | Hazard ratio (adjusted)<br>(95% CI) p-value |
|-------------|-----------------------------------------------|---------------------------------------------|
| 1-2         | 1.00 (0.84, 1.07) p=0.993                     | 1.01 (0.94, 1.08) p=0.876                   |
| 3-4         | 1.04 (0.99, 1.08) p=0.089                     | 1.04 (0.99, 1.09) p=0.093                   |
| 5-6         | <b>1.06 (1.02, 1.10) p=0.002</b>              | <b>1.06 (1.02, 1.11) p=0.007</b>            |

**eFigure 1.** (a) Progression of structural lung disease as measured by a total CF-CT score in AREST CF cohort (b) Decline of FEV<sub>1</sub> through adolescence using linked data (c) Decline of WHO BMI for age Z score through adolescence using linked data.

a)

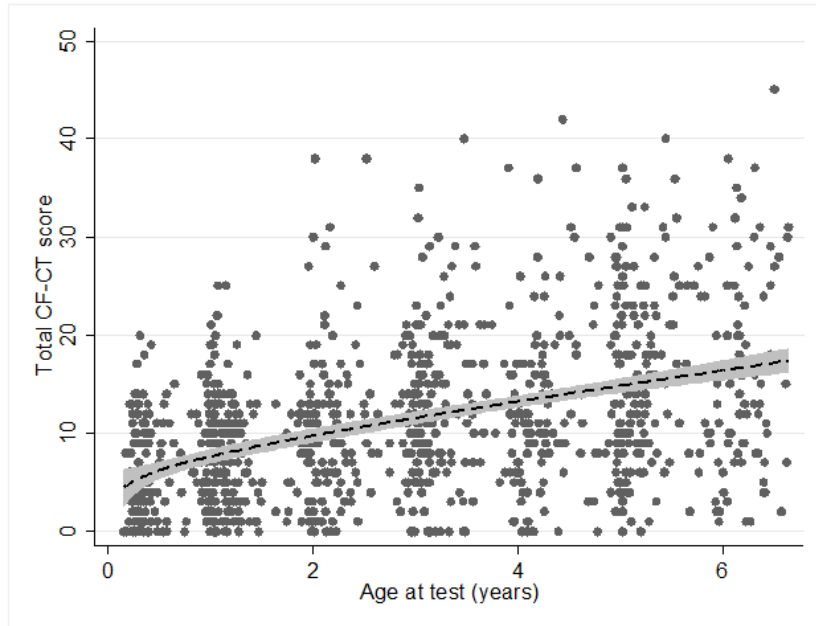

b)

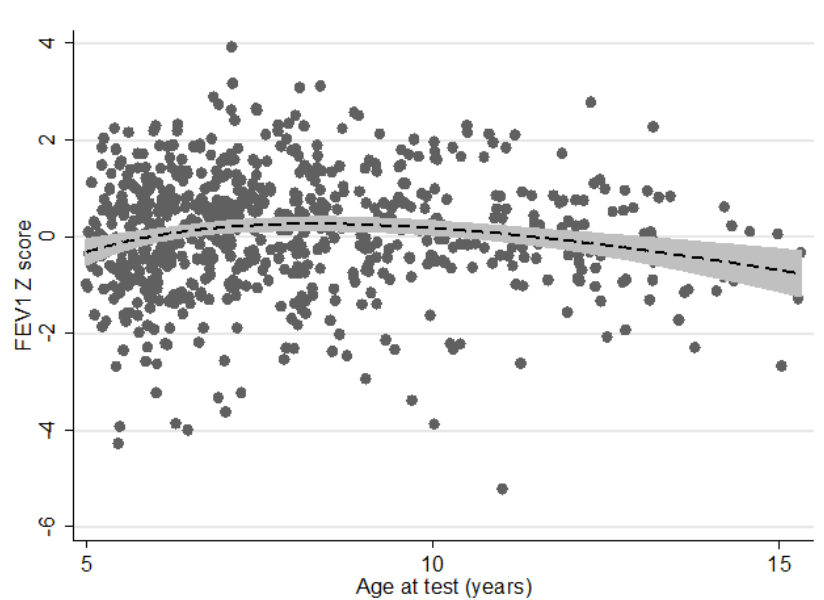

c)



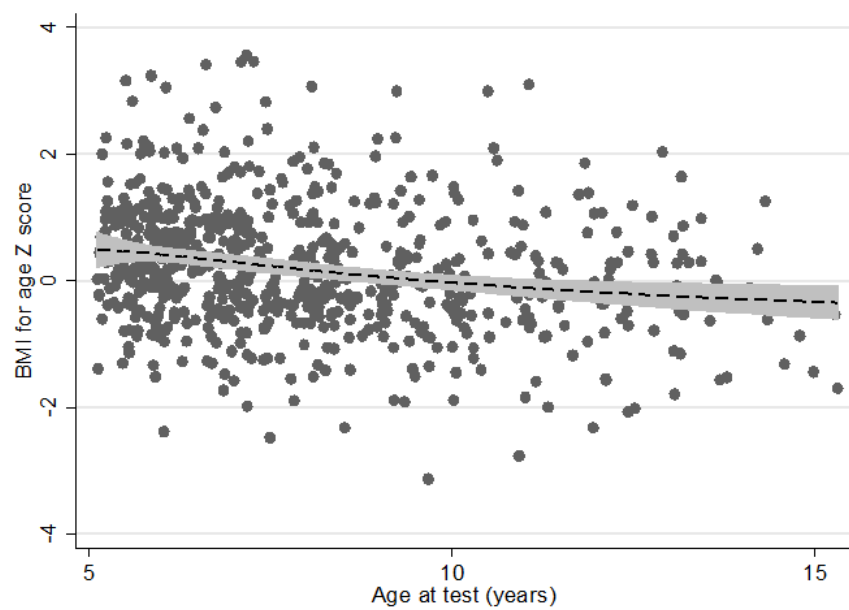

Supplement: inline-supplementary-material-1 [file inline-supplementary-material-1.pdf]
